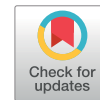

## Erratum. Establishment of the T1D Exchange Quality Improvement Collaborative (T1DX-QI). *Clinical Diabetes* 2020;38:141–151 (DOI: 10.2337/cd19-0032)

*Guy Todd Alonso, Sarah Corathers, Avni Shah, Mark Clements, Manmohan Kamboj, Rona Sonabend, Daniel DeSalvo, Sanjeev Mehta, Alyssa Cabrera, Nicole Riales, Amy Ohmer, Rajiv Mehta, and Joyce Lee*

<https://doi.org/10.2337/cd20-er03>

In the print version of the article listed above, an author's name was inadvertently misspelled. The correct spelling is Avni Shah. The online version of this article was updated to reflect this change.
